# Supplementary material for: Achieving ultralong life sodium storage in amorphous cobalt–tin binary sulfide nanoboxes sheathed in N-doped carbon
Source: Royal Society of Chemistry journal article supplement (doi:10.1039/c7ta01701d), 2017-01-01
Supplement: c7ta01701d1.pdf [file c7ta01701d1.pdf]

## Supporting Information

### Achieving Ultralong Life Sodium Storage in Amorphous Cobalt-tin Binary Sulfide Nanoboxes Sheathed in N-doped Carbon

*Xu Liu,<sup>a</sup> Yuwei Wang,<sup>a</sup> Zhiyu Wang,<sup>a,\*</sup> Tao Zhou,<sup>b</sup> Mengzhou Yu,<sup>a</sup> Luyang Xiu,<sup>a</sup> Jieshan Qiu<sup>a,\*</sup>*

<sup>a</sup> State Key Lab of Fine Chemicals, School of Chemical Engineering, Liaoning Key Lab for Energy Materials and Chemical Engineering, PSU-DUT Joint Center for Energy Research, Dalian University of Technology, Dalian 116024, China

<sup>b</sup> State Key Lab of Polymer Materials Engineering, Polymer Research Institute, Sichuan University, Chengdu 610065, China

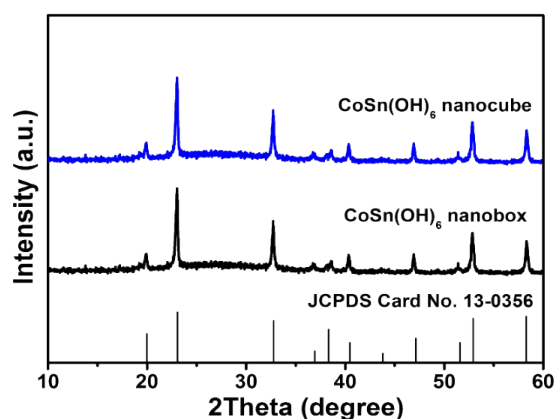

**Fig. S1.** XRD patterns of CoSn(OH)<sub>6</sub> nanocubes and nanoboxes.

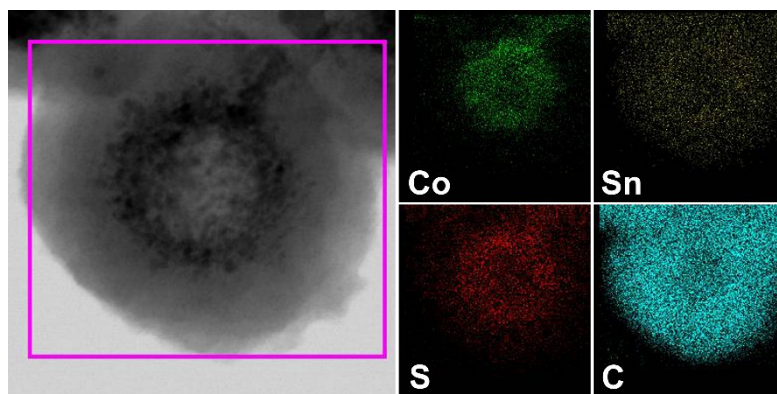

**Fig. S2.** Elemental mapping revealing the uniform distribution of Co, Sn, S and C elements in CoSnS<sub>x</sub>@NC nanoboxes.

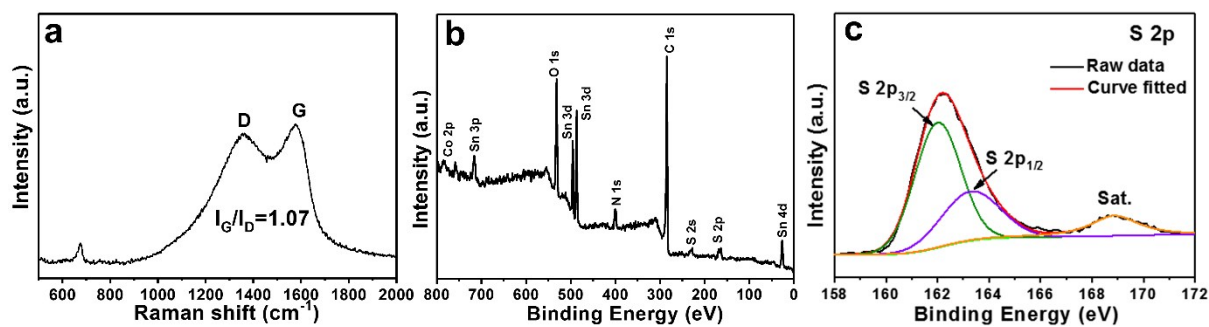

**Fig. S3.** (a) Raman spectrum of  $\text{CoSnS}_x\text{@NC}$  nanoboxes; (b) XPS survey scan of  $\text{CoSnS}_x\text{@NC}$  nanoboxes; (c) S 2p XPS spectrum of  $\text{CoSnS}_x\text{@NC}$  nanoboxes.

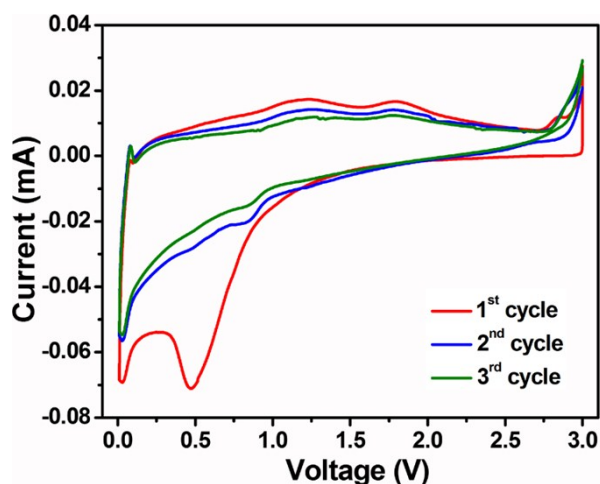

**Fig. S4.** CV curves of  $\text{CoSnS}_x\text{@NC}$  nanoboxes at a scan rate of  $0.1 \text{ mV s}^{-1}$  between 0.0-3.0 V.

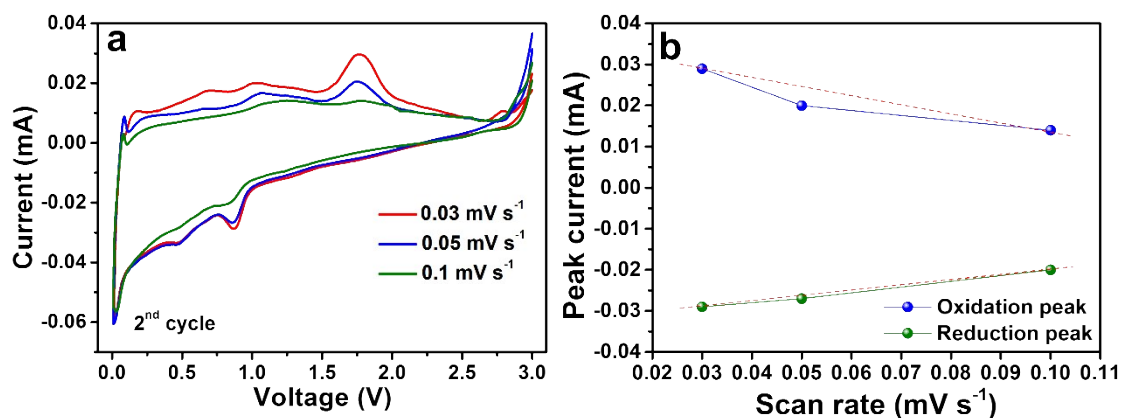

**Fig. S5.** (a) CV curves of  $\text{CoSnS}_x\text{@NC}$  nanoboxes at various scan rate of 0.03-0.1  $\text{mV s}^{-1}$  between 0.0-3.0 V; (b) the plot of oxidation/reduction peak current vs. the scan rate.

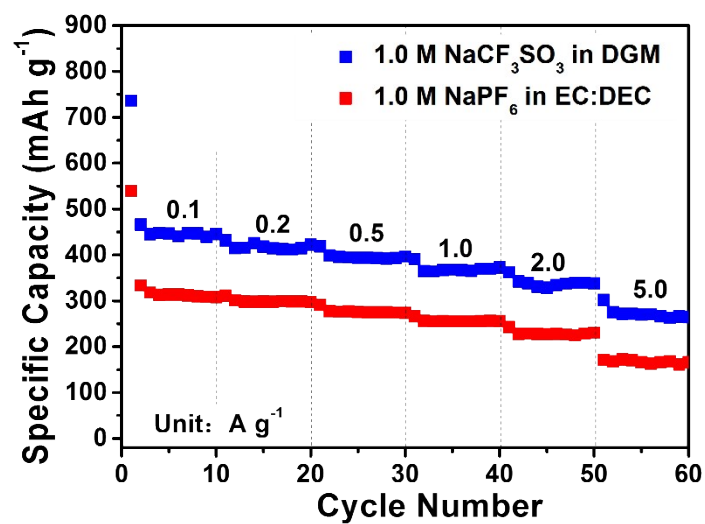

**Fig. S6.** Rate capability of CoSnS<sub>x</sub>@NC nanoboxes in 1 M NaCF<sub>3</sub>SO<sub>3</sub>/DGM and 1 M NaPF<sub>6</sub>/EC:DEC electrolyte at varied current densities of 0.1-5.0 A g<sup>-1</sup>.

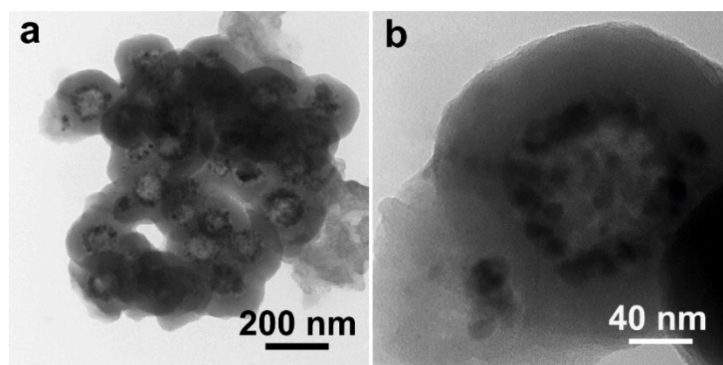

**Fig. S7.** (a) TEM images of CoSnS<sub>x</sub>@NC nanoboxes after deep cycling for 4000 cycles.

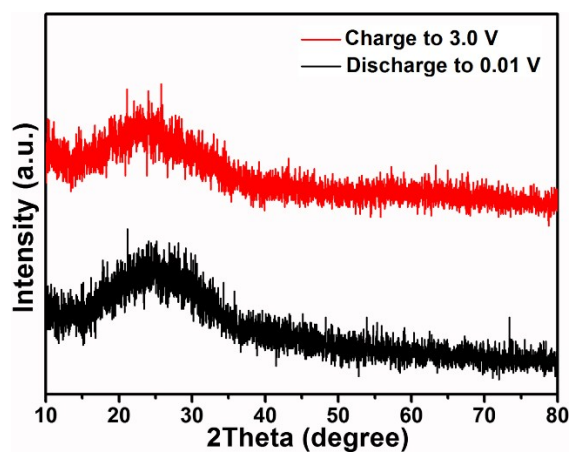

**Fig. S8.** XRD pattern of CoSnS<sub>x</sub>@NC nanoboxes after discharging to 0.01 V and charging to 3.0 V.

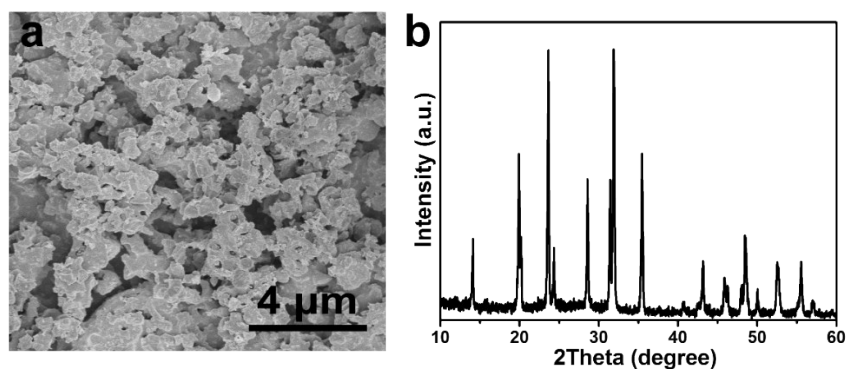

**Fig. S9.** (a) SEM image and (b) XRD pattern of  $\text{Na}_3\text{V}_2(\text{PO}_4)_3/\text{C}$  composite.

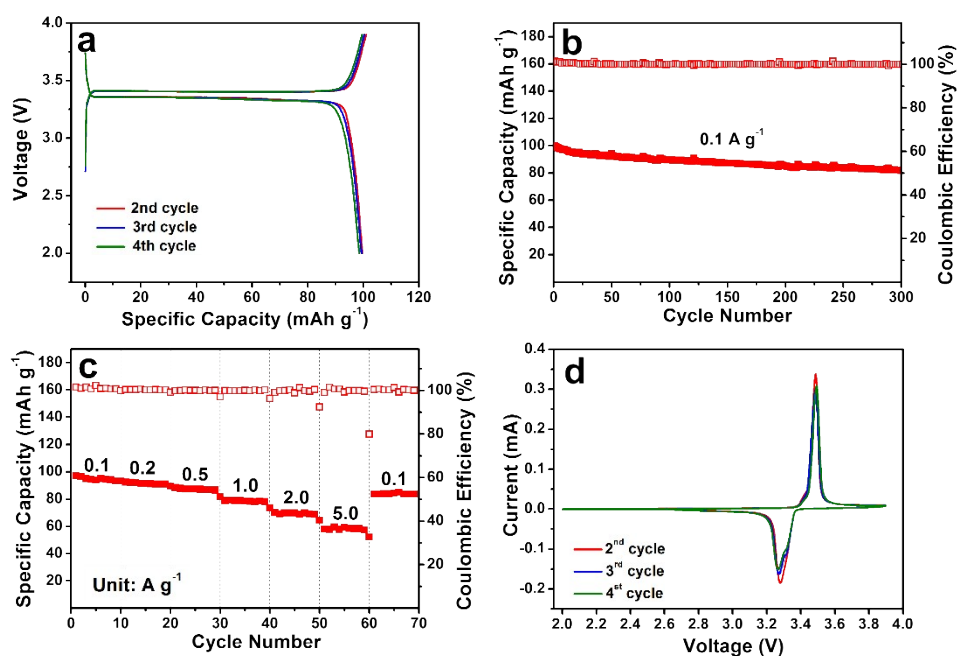

**Fig. S10.** (a) Discharge-charge voltage curves of  $\text{Na}_3\text{V}_2(\text{PO}_4)_3/\text{C}$  cathode; (b) cycling stability of  $\text{Na}_3\text{V}_2(\text{PO}_4)_3/\text{C}$  cathode at a current density of  $0.1\ \text{A g}^{-1}$ ; (c) rate capability of  $\text{Na}_3\text{V}_2(\text{PO}_4)_3/\text{C}$  composite at various current densities of  $0.1$ - $5.0\ \text{A g}^{-1}$ ; (d) CV curve of  $\text{Na}_3\text{V}_2(\text{PO}_4)_3/\text{C}$  cathode between  $2.0$ - $3.9\ \text{V}$ .
